# Supplementary material for: Modafinil decreases anxiety-like behaviour in zebrafish
Source: PeerJ. 2017 Feb 14;5:e2994. doi: 10.7717/peerj.2994 (PMC5312568; doi:10.7717/peerj.2994)
Supplement: Data S1 [file peerj-05-2994-s001.xlsx]

## Sheet: Distance moved
0	2	20	200
4365.13	4531.51	3857.94	5396
5358.9	4145.59	3662.07	6514.54
4382.39	4941.76	4406.01	5000.93
5144.18	6649.13	8636.48	6110.92
5222.53	7315.54	7596.3	4170.49
5138.72	5265.02	5803.51	5885.14
6017.5	7117.16	4259	6892.81
4766.03	7448.82	6757.22	5759.18
6446.5	9327.4	6091.96	5633.2
5225.78	4346.94	3796.96	5439.78
6675.07	4805.31	5639.01	5788.97
3697.06	5164.16	4758.95	5453.17
4589.72	7005.34	4786.62	3123.64
5024.22	6966.04	4846.62	4590.87
5433.51	5274.61	6398.66	4706.78
5544.04	5047.53	4883.06	4621.37
5425.24	7488.27	5018.6	5872.53
5506.59	4390.77	4863.96	3585.56
7560.87	5949.74	5170.07	5541.91
6453.52		5994.79	5904.73
5470		7664.26	6459.07
4713.44		6138.49	3884.77
4932.02		4281.44
5800.16		4528.25
6761.05
3980.38
8235.82
6065.52
6768.21
5061.59
4917.19
5355.5
5106.93
6247.04
6397.39

## Sheet: Time in center
0	2	20	200
2.12	6.32	0.32	29.04
0.68	14.24	19.12	2
11.88	9.44	4.52	25.96
3.12	2.28	1.12	3.84
2	1.92	8.2	12.68
11.84	3.76	12.24	1.68
3.2	2.44	4.6	3.12
1.68	0.88	7.64	6
3	2.44	5.04	1.52
0.44	2.6	1.24	7.4
1.6	0.48	2.12	3.28
5.52	1.8	1.44	20.56
10.28	4.56	9.64	12.36
0	0.4	32.68	5
0.28	3.8	8.12	8.6
3.12	8.28	10.96	4.96
0.48	16.08	4.92	1.08
0.24	24.72	3.96	5.56
1.68	4.44	4.08	4.28
10.4		7.36	1.32
1.24		1.52	1.52
2.12		1.32	3.12
24.84		54.96
1.56		2.76
1.64
1.68
1.92
6.68
0.04
2.92
1.64
9.24
4.44
6.48
10.76

## Sheet: Time in transition
0	2	20	200
139.12	143.92	172.2	320.04
47.56	267.04	153.6	80.12
127.12	201.04	231.44	234.72
68.52	132.68	191.16	73.32
158.36	79.72	98.88	256.64
104.8	138.4	145.4	173.64
89.28	164.72	69	44.8
152.76	153.88	188.76	129.96
85.28	147.88	89.36	85.56
109.8	50.44	75.24	172.4
89.36	158.44	185.48	68.76
215.48	59.4	74.56	179.2
151.4	98.28	86.32	199.32
58.44	101.72	170.76	141.28
161.44	137.92	133.96	206.6
89.92	89.04	213.92	124.12
33.8	264.84	191	101.52
24.44	252.2	301.28	194.68
39.12	112.36	110.88	78
106.28		178.28	91.48
40.36		152.52	137.12
75.56		74.92	83.56
211.72		179.92
33.88		128.4
71.32
60.2
73.68
124.76
26.2
93.96
147.32
243.76
79.12
85.08
134.12

## Sheet: Time in thigmotaxis
0	2	20	200
458.8	449.8	427.52	250.96
551.8	318.76	427.32	517.92
461.04	389.56	364.08	339
528.4	465.08	407.56	522.88
439.68	518.4	492.96	330.72
483.4	457.88	442.04	424.72
507.56	432.88	526.44	552.12
445.6	445.28	403.64	464.08
511.76	449.72	505.44	512.96
489.8	547	523.56	420.24
509.08	441.12	412.44	527.88
379.04	538.84	524.04	400.28
438.36	497.2	504.08	388.28
541.6	497.92	396.6	453.76
438.32	458.32	457.96	384.64
507	502.72	375.16	470.96
565.76	319.12	404.12	497.44
575.36	323.12	294.8	399.8
559.24	483.24	485.08	517.52
483.36		414.4	507.24
558.44		445.76	461.36
522.36		523.8	513.2
363.48		365
564.6		468.88
527.08
538.16
524.44
468.6
573.8
503.16
451.08
347.04
516.48
508.4
454.64

## Sheet: immobility
0	2	20	200
0.92	4.72	31.28	0.12
0.48	6.56	4.44	0.08
1.28	3.92	6.08	1.32
0.72	0.08	5.52	0
28.36	0.24	0.68	11.68
1.44	1.28	0.4	2.04
0.28	0.4	7.12	0.08
0.32	0.16	0.6	0.28
0.48	0.04	31.12	1.28
1.08	0.72	3.8	1.4
0.56	1.04	111.88	0.32
13.24	43.56	0.56	2.68
3.96	0.2	3.24	102.32
0.56	1.8	2.32	84.84
2	2.2	0.2	8.28
0.84	0.76	1.04	17.8
0.32	1.2	0.68	131.36
0.2	2	1.28	5.92
0	1.36	60.16	0.68
0.12		2.84	3.4
0.28		0.04	3.32
1.84		0.68	2.36
3.76		4.76
0.72		1.8
41.08
2.04
2.4
1
0.4
0.84
28.08
20.28
10
1.28
0.24

## Sheet: Meandering
0	2	20	200
0	0.825173	4.11115	5.36208
17.2002	10.8129	0	10.4999
25.0694	1.07525	7.94276	24.8921
5.74678	27.5451	4.60276	2.49547
52.5214	10.7834	5.77944	4.79415
0	7.42547	6.66061	8.24283
0	7.20383	4.65001	4.8111
5.7898	3.89864	4.2121	18.401
12.835	5.09833	5.08624	0
3.89367	21.6659	12.9463	8.87882
5.91893	7.01809	4.41687	4.83638
3.45987	6.65234	3.98186	6.13282
7.72008	6.94724	6.93873	8.09973
9.29132	5.87518	7.53772	6.21397
0	4.9764	15.8845	5.73265
15.4107	5.63451	6.27684	7.28615
7.99343	4.84047	2.9266	4.92456
9.80771	4.9792	7.99415	3.76093
0	6.40652	6.39764	6.42413
0		5.68776	6.12154
4.76496		4.95177	4.85404
11.4286		5.6956	0
6.62435		5.76723
6.82888		11.8372
8.36141
4.60979
5.68511
4.94063
7.27749
4.19317
5.26848
5.33878
5.6166
6.13019

## Sheet: Ethanol vs Control
Distance moved			Meandering			Immobility
ETHANOL	CONTROL		ETHANOL	CONTROL		ETHANOL	CONTROL
1514.63	698.605		5.7721	0		288.88	242.6
2487.54	2272.75		6.10102	9.46472		207.4	94.88
5809.42	4134.81		7.37954	6.56176		1.44	2.68
5885.17	3675.45		5.67708	4.48532		95.48	38.32
6289.64	2011.6		5.96468	10.5528		1.8	152.32
5095.02	4288.7		5.17164	5.34184		34.24	8.16
3095.93	2080.49		6.15598	4.76668		43.08	62.6
2679.27	3829.47		6.9668	3.8913		88.6	11.52
3220.88	3792.85		5.37339	5.25388		134.84	42
3918.34	4946.8		5.13251	7.56391		127.68	4.84
3856.96	233.54		5.17449	4.30626		13.08	354
3763.44	3961.69		5.15616	3.59472		89.88	6.56
2177.53	3610.65		7.22572	11.0578		114.32	46.52
2631.27	4471.06		4.96212	5.35414		190.8	11.28
2090.54	4735.39		10.368	4.71387		86.32	4.32
2109.36	4651.05		6.69098	11.7624		90.08	6.2
2670.14	5093.68		5.48794	4.53557		152.84	6.36
3532.49	7713.01		6.8931	4.7155		170.68	0.36
1079.98	3123.29		4.20578	4.516		216.6	17.56
408.384			7.58654			385.52
Time in center			Time in transition			Time in thigmotaxis
ETHANOL	CONTROL		ETHANOL	CONTROL		ETHANOL	CONTROL
0.4	1.04		22.36	40.24		577.16	558.76
0.84	0.96		68.04	59.28		531.08	538.8
1.12	0.32		239	28.6		359.88	571.12
1.4	0.48		120.28	152.36		478.36	320.36
0.68	3.76		362	180.16		236.4	415.48
0.6	5		110.12	94.52		488.04	490
7.32	1.92		96.32	187.88		495.16	280.08
0.56	0.6		129.52	43.8		412.12	550.04
0	0.92		316.12	130.64		283.92	468.24
0.68	0.12		36.8	54.16		562.4	545.64
0.52	0		491.28	0		108.24	600.04
1.92	5.24		163.04	134.2		433.08	458.56
11.96	4		113.12	74.52		474.88	520.24
4.64	0.96		43.76	82.16		551.2	515.92
1.44	6.08		94.6	219.08		465.28	371.12
0	1		243.84	45.68		236.72	549.08
0.36	0.4		84.96	82.76		512.36	484.68
2.68	4.36		311.88	210.84		285.48	383
0	2.08		357.76	121.56		240.76	472.48
0			584.52			15.52
